# Supplementary material for: Novel Chromatographic Method Development and Validation for Nitroglycerin Determination in Semi-Solid Dosage Forms by RP-HPLC
Source: Research Square preprint supplement (doi:10.21203/rs.3.rs-8723511/v1), 2026-02-24
Supplement: Supplementary file 1 [file 7b65b70d1b998142ba87ff64.docx]

**Chromatographic Method Development and Validation for Nitroglycerin Determination in Semi-Solid Dosage Forms by RP-HPLC**

**Pradip Patil1, Bhavin Dhaduk1, Pankajkumar Nariya1, Shamkumar P. Deshmukh2, Mahesh Savant1***

**1 Department of Chemical Sciences, Faculty of Science, Atmiya University, Rajkot**

**2Department of Chemistry, D.B.F. Dayanand College of Arts and Science, Solapur, 413004 India.**

***Email: mahesh.savant@atmiyauni.ac.in.**

**Supplementary Material**

**Table S1. Analytical eco-scale (EAS) calculation for the proposed HPLC method**

| Category | Details | Penalty points (PP) |
| --- | --- | --- |
| **Reagent** | | |
| **Reagent amount** | **15 mL / run** | **2** |
| **Reagent Hazardous (Methanol)** | **More severe hazard** | **2** |
| **Total PP =** | | **∑ 2+2 = 4** |
| **Instruments** | | |
| **Energy consumption (HPLC)** | **< 0.1 kWh/sample** | **0** |
| **Waste generation** | **> 10 mL/sample** | **5** |
| **Occupational Hazard** | **Controlled lab use.**  **But might be exposure to air** | **3** |
| **Heater (column temperature)** | **25 0C** | **0** |
| **pH of the method (Mobile phase)** | **6.5** | **0** |
| **Conditioning and washing time** | **Normal** | **0** |
| **Total PP =** | | **∑ 1+5+3 = 9** |
| **Analytical eco scale (EAS) score = 100 - 13** | | **87** |

**Table S2. Assessment of greenness for the proposed method**

| Method | Chromatographic Conditions | MoGAPI | EAS | AGREE prep. |
| --- | --- | --- | --- | --- |
| Proposed method | **RP- HPLC method, for determination of NTG and its mono and dinitrate metabolites, using water and methanol in a 60:40 (v/v) ratio.** | **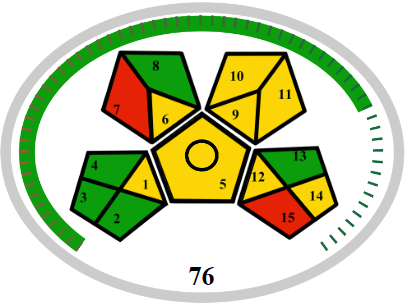** | **1+5+3 = 9**  **∑ = 89** | **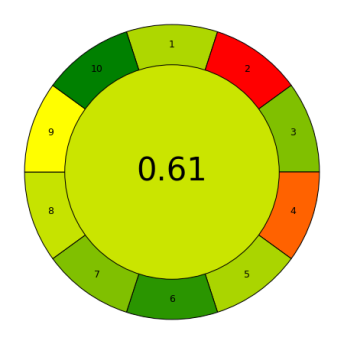** |
